# Supplementary material for: A therapeutic HBV vaccine containing a checkpoint modifier enhances CD8+ T cell and antiviral responses
Source: PubMed Central journal article supplement (PMC11601613; doi:10.1172/jci.insight.181067), 2024-11-08

Figure S2

**A Tetramer stain**

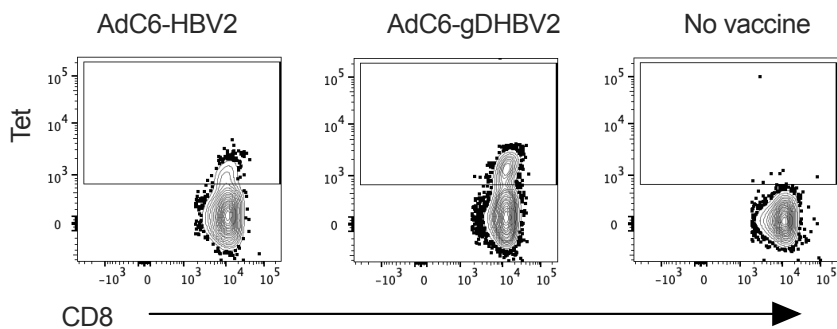

**B Dextramer stain**

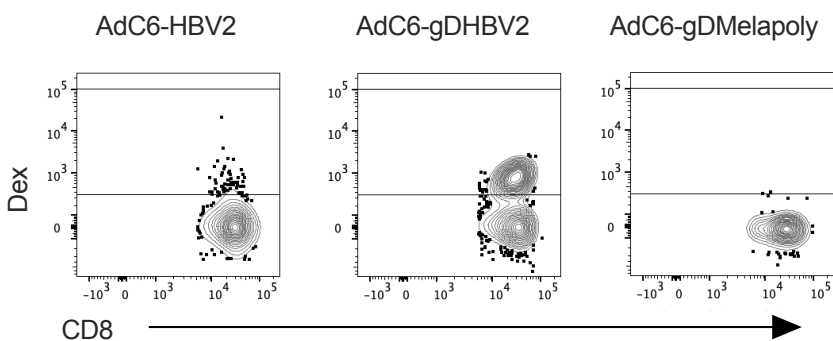

**C**

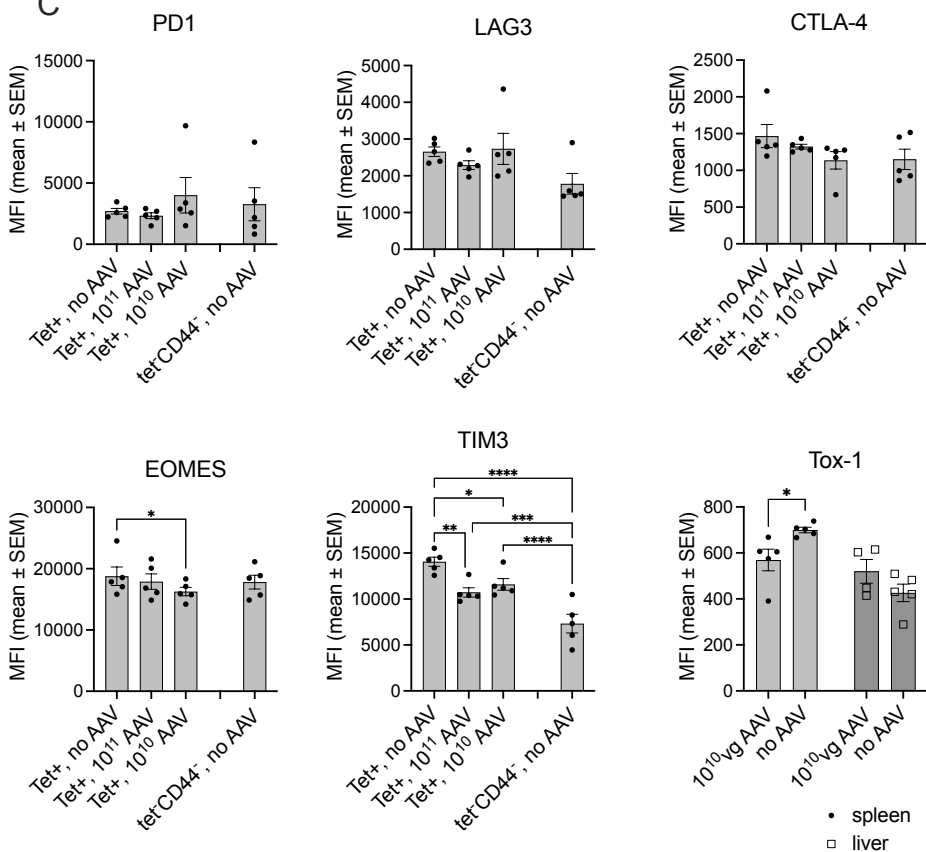

Figure S3

**A** HBV2 insert  
YLPLDKGIKPYYPEHAVNHYFQTRHYLHTLWKAGILYKRETRRSASFSGSPYSWEQELQHGSCWWLQFRNSKPCSEYCL  
THLVNLLLEDWGPCDEHGEHHRIPRTPARVTGGVFLVDKNPHNTAESRLVVDFSQFSGRITRVSWPKFAVPNLQSLTNL  
LSSNLSWLSLDVQAFTFSPTYKAFLSKQYLNLYPVARQRPGLCQVFADATPTGWGLAMGHQRMRTGFVAPLPIHTAEL  
LAACFARSRSKAKILGTDNSVLSRKYTSFPWLLGCAANWILRGTSFVYVPSALNPADDVGSNLEDPASRELVVSYNV  
NMGLKIRQLLWFHISCLTFGRETVIEYLVSFVGVWIRTPPAYRPPNAPILSTLPETTIVRRRDRGR

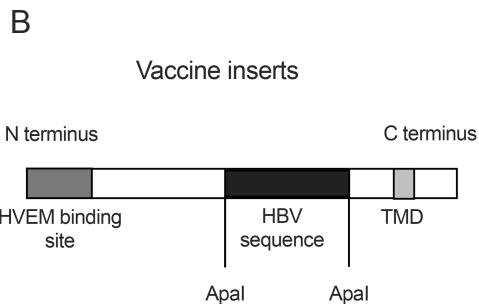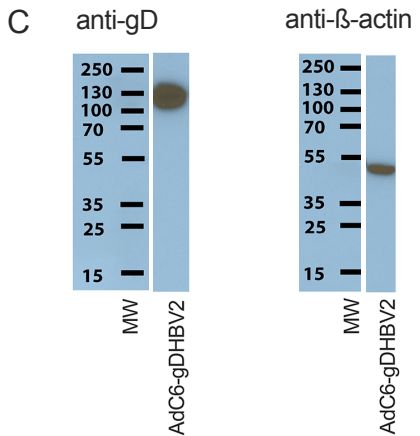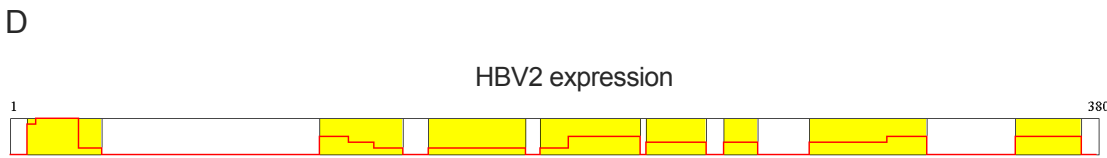

Supplement: jciinsight-9-181067-s065.pdf [file jciinsight-9-181067-s065.pdf]
